# Supplementary material
Source: MDPI journal article supplement (https://www.mdpi.com/2077-0472/8/7/92)
Supplement: s1 [file s1]

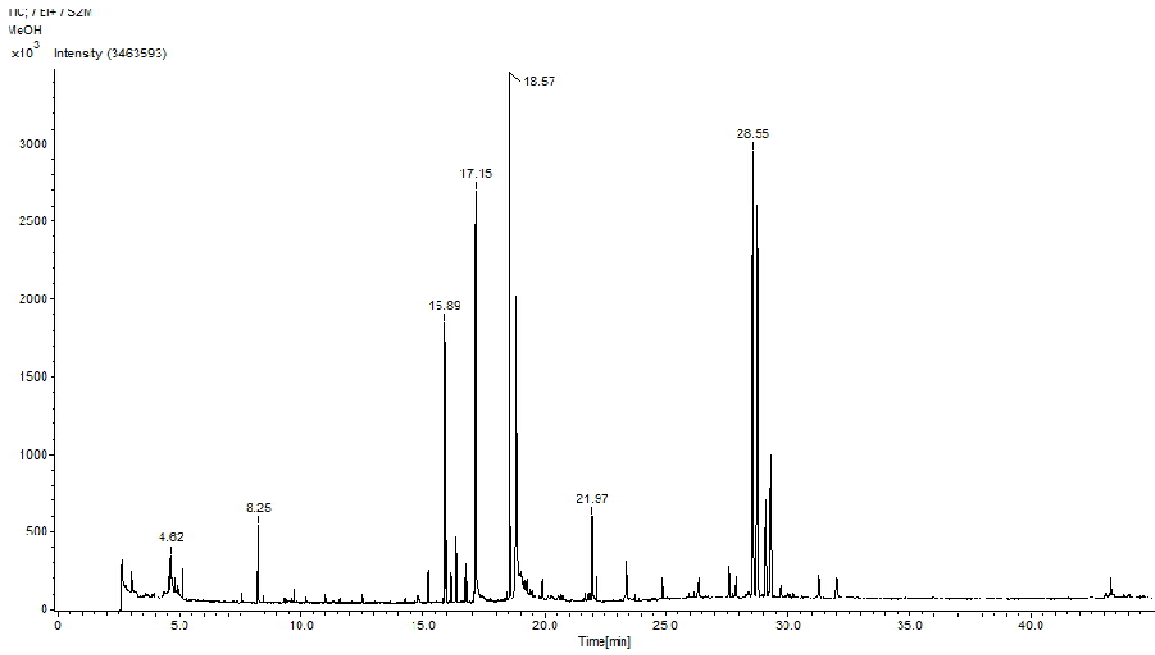

Supplementary Materials, Figure S1. Gas Chromatography-Mass Spectrometry (GC-MS) chromatogram of methanol extract.

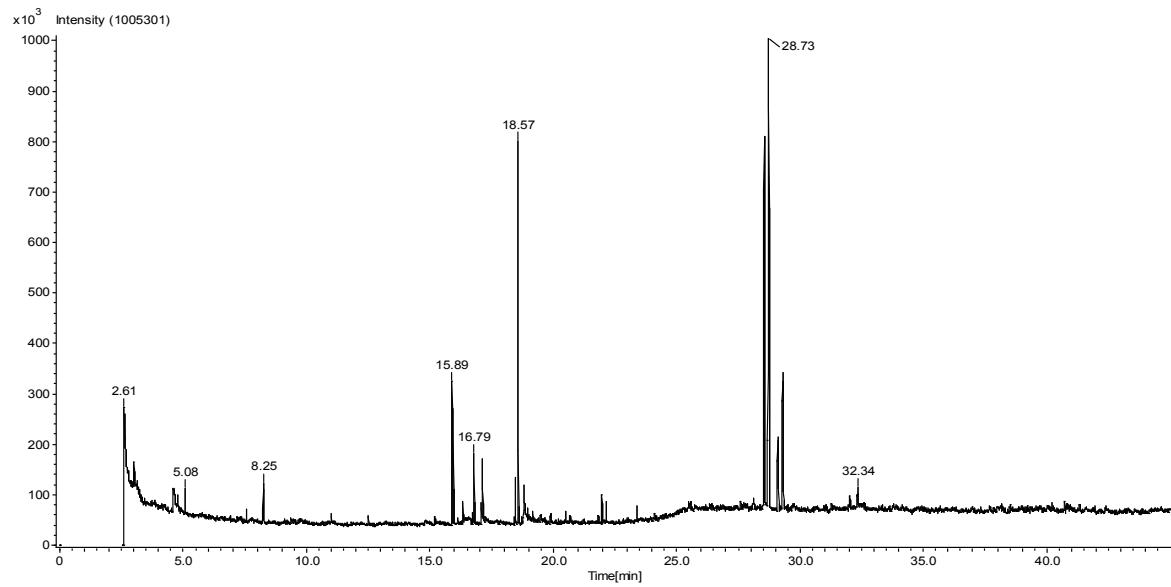

Supplementary Materials, Figure S2. GC-MS chromatogram of hexane extract.

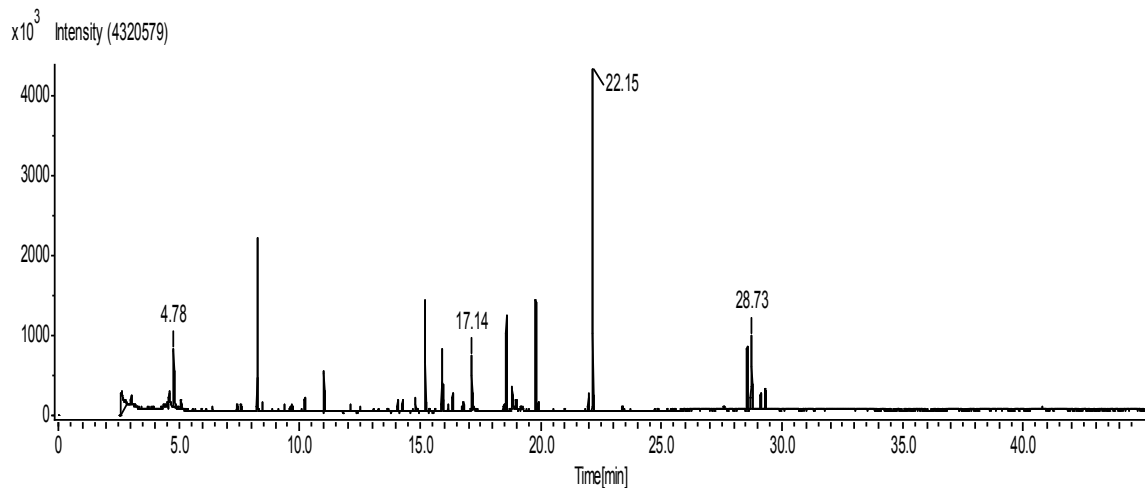

Supplementary Materials, Figure S3. GC-MS chromatogram of ethyl acetate extract.

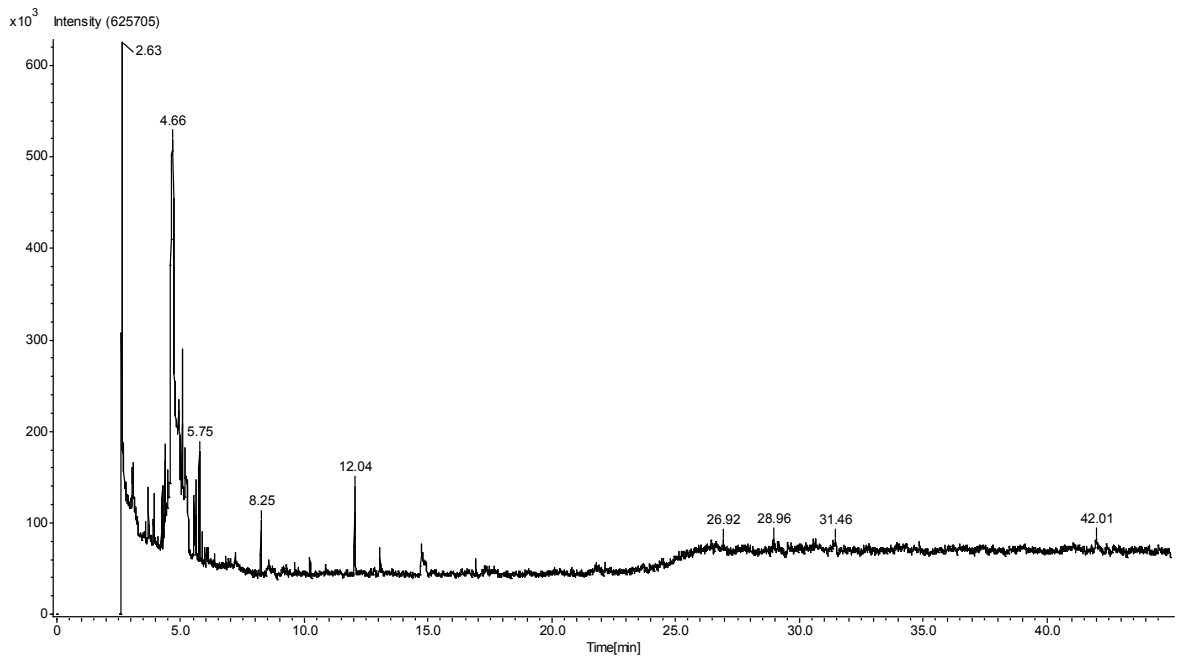

Supplementary Materials, Figure S4. GC-MS chromatogram of butanol extract.

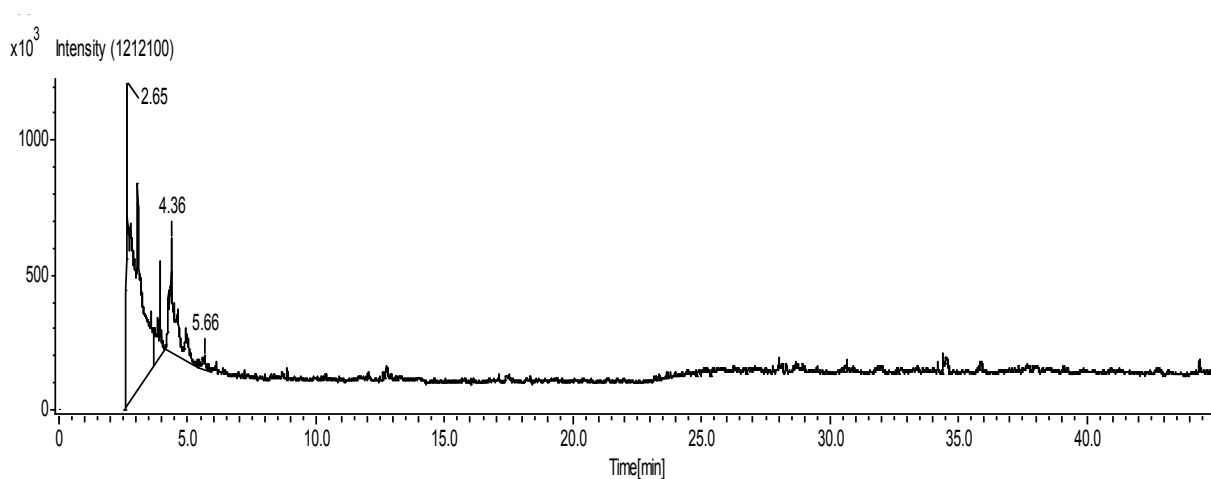

Supplementary Materials, Figure S5. GC-MS chromatogram of aqueous extract.

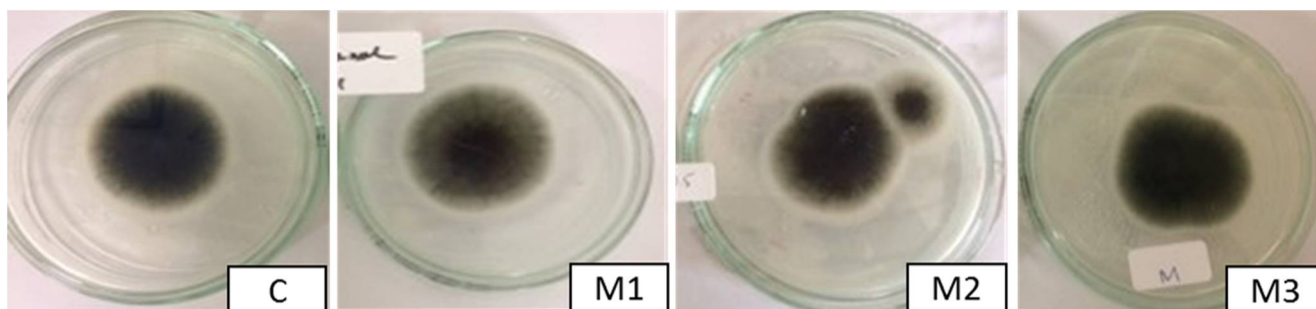

Supplementary Materials, Figure S6. Growth of *P. grisea* on Potato Dextrose Agar (PDA) medium with different concentrations as control (C), 0.1 mg/ml (M1), 0.5 mg/ml (M2), and 1 mg/ml (M3) of methanol fraction.

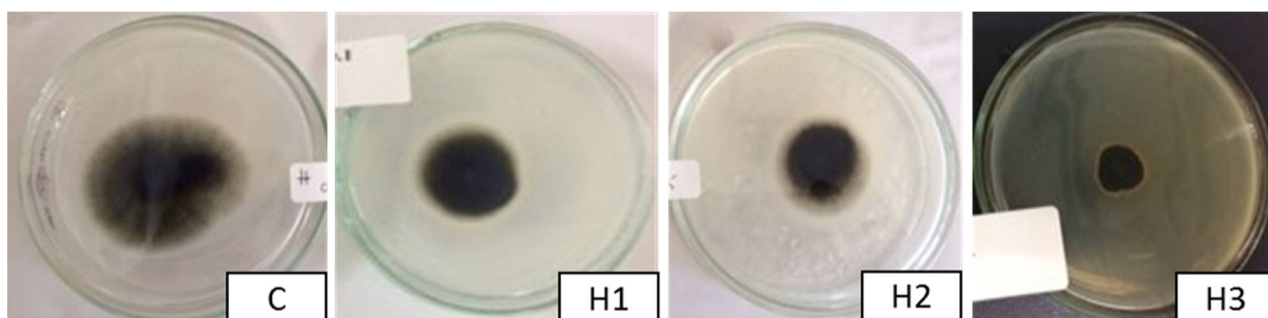

Supplementary Materials, Figure S7. Growth of *P. grisea* s on PDA medium with different concentrations as control (C), 0.1 mg/ml (H1), 0.5 mg/ml (H2), and 1 mg/ml (H3) of hexane extract.

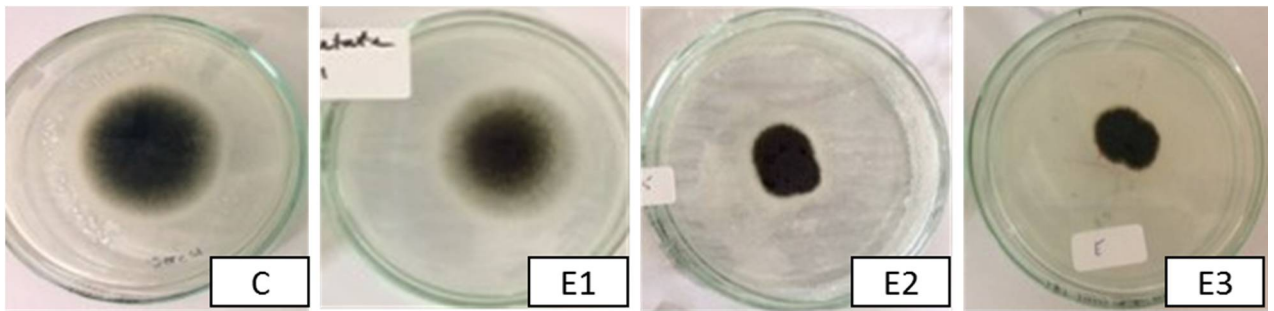

Supplementary Materials, Figure S8. Growth of *P. grisea* on PDA medium with different concentrations as control (C), 0.1 mg/ml (E1), 0.5 mg/ml (E2), and 1 mg/ml (E3) of ethyl acetate extract.

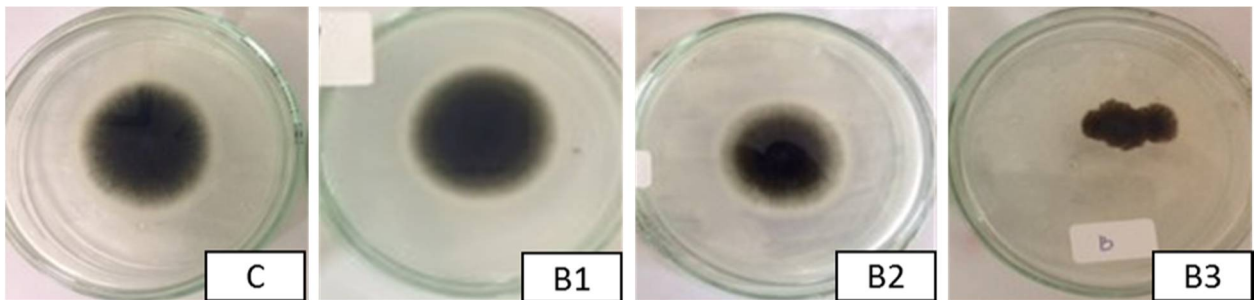

Supplementary Materials, Figure S9. Growth of *P. grisea* on PDA medium different concentrations as control (C), 0.1 (B1), 0.5 (B2), and 1 mg/ml (B3) of butanol extract.

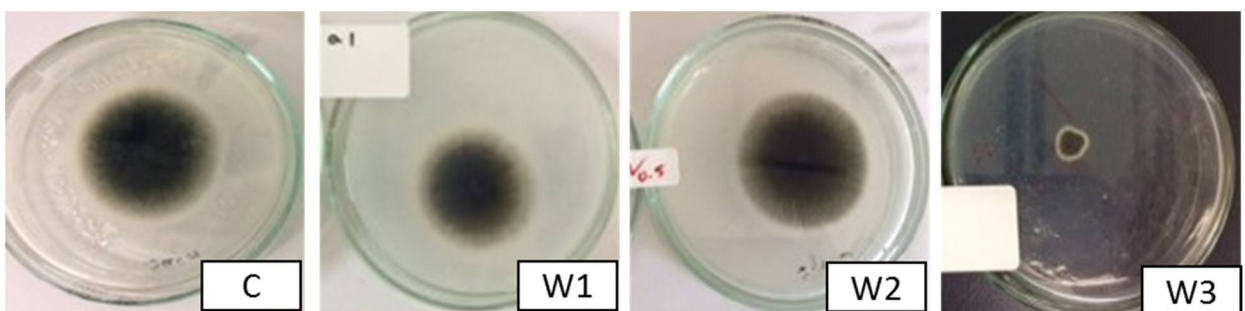

Supplementary Materials, Figure S10. Growth of *P. grisea* on PDA medium with different concentrations as control (C), 0.1 mg/ml (W1), 0.5 mg/ml (W2), and 1 mg/ml (W3) of aqueous extract.
